# Supplementary material for: Comparing Patient Characteristics, Clinical Outcomes, and Biomarkers of Severe Asthma Patients in Taiwan
Source: MDPI journal article supplement (doi:10.3390/biomedicines9070764), 2021-07-01
Supplement: s1 [file s1]

**Supplemental table 1** Treatment

The biomarker group with EOS count  $\geq 300$  and FeNo measure  $\geq 20$  had more patients treated with ICS/LABA/LAMA, LTA, omalizumab and prednisolone, while other biomarker groups with other combination of EOS count and FeNo measure had more patients using ICS alone, Theophylline, and antihistamine.

| BIOMARKER GROUP                 | All patient | ICS alone |       | ICS/LABA |       | ICS/LAMA |      | ICS/LABA/LAMA |       | LTA |       | Theophylline |       | Antihistamine |       | Omalizumab |       | Pred |      |
|---------------------------------|-------------|-----------|-------|----------|-------|----------|------|---------------|-------|-----|-------|--------------|-------|---------------|-------|------------|-------|------|------|
|                                 | N           | N         | %     | N        | %     | N        | %    | N             | %     | N   | %     | N            | %     | N             | %     | N          | %     | N    | %    |
| <b>CRITERIA SET #1</b>          |             |           |       |          |       |          |      |               |       |     |       |              |       |               |       |            |       |      |      |
| EOS <300 & FeNO < 20            | 26          | 1         | 3.85  | 20       | 76.92 | 1        | 3.85 | 4             | 15.38 | 8   | 30.77 | 18           | 69.23 | 3             | 11.54 | 1          | 3.85  | 1    | 3.85 |
| EOS $\geq 300$ & FeNO < 20      | 6           | 1         | 16.67 | 3        | 50.00 | 0        | 0.00 | 1             | 16.67 | 3   | 50.00 | 5            | 83.33 | 1             | 16.67 | 2          | 33.33 | 0    | 0.00 |
| EOS <300 & FeNO $\geq 20$       | 62          | 1         | 1.61  | 42       | 67.74 | 0        | 0.00 | 19            | 30.65 | 27  | 43.55 | 40           | 64.52 | 3             | 4.84  | 4          | 6.45  | 4    | 6.45 |
| EOS $\geq 300$ & FeNO $\geq 20$ | 33          | 0         | 0.00  | 20       | 60.61 | 2        | 6.06 | 11            | 33.33 | 17  | 51.52 | 17           | 51.52 | 1             | 3.03  | 3          | 9.09  | 3    | 9.09 |
| missing                         | 5           |           |       |          |       |          |      |               |       |     |       |              |       |               |       |            |       |      |      |
| <b>CRITERIA SET #2</b>          |             |           |       |          |       |          |      |               |       |     |       |              |       |               |       |            |       |      |      |
| EOS $\geq 300$ & FeNO $\geq 20$ | 33          | 0         | 0.00  | 20       | 60.61 | 2        | 6.06 | 11            | 33.33 | 17  | 51.52 | 17           | 51.52 | 1             | 3.03  | 3          | 9.09  | 3    | 9.09 |
| Others                          | 94          | 3         | 3.19  | 65       | 69.15 | 1        | 1.06 | 24            | 25.53 | 38  | 40.43 | 63           | 67.02 | 7             | 7.45  | 7          | 7.45  | 5    | 5.32 |
| missing                         | 5           |           |       |          |       |          |      |               |       |     |       |              |       |               |       |            |       |      |      |
| <b>CRITERIA SET #3</b>          |             |           |       |          |       |          |      |               |       |     |       |              |       |               |       |            |       |      |      |
| EOS <150                        | 50          | 1         | 2.00  | 38       | 76.00 | 0        | 0.00 | 11            | 22.00 | 17  | 34.00 | 33           | 66.00 | 2             | 4.00  | 2          | 4.00  | 3    | 6.00 |
| EOS $\geq 150$                  | 81          | 2         | 2.47  | 51       | 62.96 | 3        | 3.70 | 24            | 29.63 | 39  | 48.15 | 47           | 58.02 | 6             | 7.41  | 8          | 9.88  | 5    | 6.17 |
| missing                         | 1           |           |       |          |       |          |      |               |       |     |       |              |       |               |       |            |       |      |      |
| <b>CRITERIA SET #4</b>          |             |           |       |          |       |          |      |               |       |     |       |              |       |               |       |            |       |      |      |
| EOS <200                        | 71          | 1         | 1.41  | 51       | 71.83 | 1        | 1.41 | 18            | 25.35 | 28  | 39.44 | 44           | 61.97 | 3             | 4.23  | 2          | 2.82  | 3    | 4.23 |
| EOS $\geq 200$                  | 60          | 2         | 3.33  | 38       | 63.33 | 2        | 3.33 | 17            | 28.33 | 28  | 46.67 | 36           | 60.00 | 5             | 8.33  | 8          | 13.33 | 5    | 8.33 |
| missing                         | 1           |           |       |          |       |          |      |               |       |     |       |              |       |               |       |            |       |      |      |
| <b>CRITERIA SET #5</b>          |             |           |       |          |       |          |      |               |       |     |       |              |       |               |       |            |       |      |      |
| EOS <250                        | 78          | 1         | 1.28  | 56       | 71.79 | 1        | 1.28 | 20            | 25.64 | 30  | 38.46 | 49           | 62.82 | 3             | 3.85  | 3          | 3.85  | 3    | 3.85 |
| EOS $\geq 250$                  | 53          | 2         | 3.77  | 33       | 62.26 | 2        | 3.77 | 15            | 28.30 | 26  | 49.06 | 31           | 58.49 | 5             | 9.43  | 7          | 13.21 | 5    | 9.43 |

|                      |    |   |      |    |       |   |      |    |       |    |       |    |       |   |       |   |       |   |       |
|----------------------|----|---|------|----|-------|---|------|----|-------|----|-------|----|-------|---|-------|---|-------|---|-------|
| missing              | 1  |   |      |    |       |   |      |    |       |    |       |    |       |   |       |   |       |   |       |
| CRITERIA SET #6      |    |   |      |    |       |   |      |    |       |    |       |    |       |   |       |   |       |   |       |
| EOS <300             | 90 | 2 | 2.22 | 64 | 71.11 | 1 | 1.11 | 23 | 25.56 | 35 | 38.89 | 58 | 64.44 | 6 | 6.67  | 5 | 5.56  | 5 | 5.56  |
| EOS ≥300             | 41 | 1 | 2.44 | 25 | 60.98 | 2 | 4.88 | 12 | 29.27 | 21 | 51.22 | 22 | 53.66 | 2 | 4.88  | 5 | 12.20 | 3 | 7.32  |
| missing              | 1  |   |      |    |       |   |      |    |       |    |       |    |       |   |       |   |       |   |       |
| CRITERIA SET #7      |    |   |      |    |       |   |      |    |       |    |       |    |       |   |       |   |       |   |       |
| FeNO <20             | 32 | 2 | 6.25 | 23 | 71.88 | 1 | 3.13 | 5  | 15.63 | 11 | 34.38 | 23 | 71.88 | 4 | 12.50 | 3 | 9.38  | 1 | 3.13  |
| FeNO ≥20             | 96 | 1 | 1.04 | 63 | 65.63 | 2 | 2.08 | 30 | 31.25 | 44 | 45.83 | 57 | 59.38 | 4 | 4.17  | 7 | 7.29  | 8 | 8.33  |
| missing              | 4  |   |      |    |       |   |      |    |       |    |       |    |       |   |       |   |       |   |       |
| CRITERIA SET #8      |    |   |      |    |       |   |      |    |       |    |       |    |       |   |       |   |       |   |       |
| FeNO <25             | 57 | 2 | 3.51 | 39 | 68.42 | 2 | 3.51 | 13 | 22.81 | 23 | 40.35 | 42 | 73.68 | 4 | 7.02  | 4 | 7.02  | 3 | 5.26  |
| FeNO ≥25             | 71 | 1 | 1.41 | 47 | 66.20 | 1 | 1.41 | 22 | 30.99 | 32 | 45.07 | 38 | 53.52 | 4 | 5.63  | 6 | 8.45  | 6 | 8.45  |
| missing              | 4  |   |      |    |       |   |      |    |       |    |       |    |       |   |       |   |       |   |       |
| CRITERIA SET #9      |    |   |      |    |       |   |      |    |       |    |       |    |       |   |       |   |       |   |       |
| FeNO <30             | 73 | 2 | 2.74 | 51 | 69.86 | 2 | 2.74 | 17 | 23.29 | 32 | 43.84 | 51 | 69.86 | 5 | 6.85  | 5 | 6.85  | 4 | 5.48  |
| FeNO ≥30             | 55 | 1 | 1.82 | 35 | 63.64 | 1 | 1.82 | 18 | 32.73 | 23 | 41.82 | 29 | 52.73 | 3 | 5.45  | 5 | 9.09  | 5 | 9.09  |
| missing              | 4  |   |      |    |       |   |      |    |       |    |       |    |       |   |       |   |       |   |       |
| CRITERIA SET #10     |    |   |      |    |       |   |      |    |       |    |       |    |       |   |       |   |       |   |       |
| FeNO <35             | 81 | 3 | 3.70 | 55 | 67.90 | 2 | 2.47 | 20 | 24.69 | 36 | 44.44 | 55 | 67.90 | 5 | 6.17  | 6 | 7.41  | 4 | 4.94  |
| FeNO ≥35             | 47 | 0 | 0.00 | 31 | 65.96 | 1 | 2.13 | 15 | 31.91 | 19 | 40.43 | 25 | 53.19 | 3 | 6.38  | 4 | 8.51  | 5 | 10.64 |
| missing              | 4  |   |      |    |       |   |      |    |       |    |       |    |       |   |       |   |       |   |       |
| CRITERIA SET #11     |    |   |      |    |       |   |      |    |       |    |       |    |       |   |       |   |       |   |       |
| FeNO <40             | 93 | 3 | 3.23 | 61 | 65.59 | 3 | 3.23 | 25 | 26.88 | 41 | 44.09 | 60 | 64.52 | 5 | 5.38  | 6 | 6.45  | 4 | 4.30  |
| FeNO ≥40             | 35 | 0 | 0.00 | 25 | 71.43 | 0 | 0.00 | 10 | 28.57 | 14 | 40.00 | 20 | 57.14 | 3 | 8.57  | 4 | 11.43 | 5 | 14.29 |
| missing              | 4  |   |      |    |       |   |      |    |       |    |       |    |       |   |       |   |       |   |       |
| CRITERIA SET #12     |    |   |      |    |       |   |      |    |       |    |       |    |       |   |       |   |       |   |       |
| EOS <150 & FeNO < 25 | 22 | 0 | 0.00 | 17 | 77.27 | 0 | 0.00 | 5  | 22.73 | 8  | 36.36 | 17 | 77.27 | 2 | 9.09  | 1 | 4.55  | 1 | 4.55  |

|                                 |    |   |      |    |       |   |      |    |       |    |       |    |       |   |      |   |      |   |      |
|---------------------------------|----|---|------|----|-------|---|------|----|-------|----|-------|----|-------|---|------|---|------|---|------|
| EOS $\geq 150$ & FeNO $< 25$    | 35 | 2 | 5.71 | 22 | 62.86 | 2 | 5.71 | 8  | 22.86 | 15 | 42.86 | 25 | 71.43 | 2 | 5.71 | 3 | 8.57 | 2 | 5.71 |
| EOS $< 150$ & FeNO $\geq 25$    | 27 | 1 | 3.70 | 20 | 74.07 | 0 | 0.00 | 6  | 22.22 | 9  | 33.33 | 16 | 59.26 | 0 | 0.00 | 1 | 3.70 | 2 | 7.41 |
| EOS $\geq 150$ & FeNO $\geq 25$ | 43 | 0 | 0.00 | 26 | 49.06 | 1 | 1.89 | 16 | 30.19 | 23 | 43.40 | 22 | 41.51 | 4 | 7.55 | 5 | 9.43 | 3 | 5.66 |
| Missing                         | 5  |   |      |    |       |   |      |    |       |    |       |    |       |   |      |   |      |   |      |

---
